# Supplementary material for: Dietary Flaxseed and Flaxseed Oil Differentially Modulate Aspects of the Microbiota Gut–Brain Axis Following an Acute Lipopolysaccharide Challenge in Male C57Bl/6 Mice
Source: MDPI journal article supplement (doi:10.3390/nu15163542), 2023-08-11
Supplement: s1 [file s1]

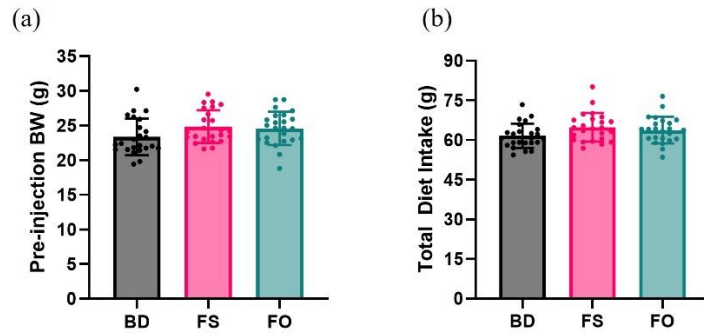

**Figure S1:** BW (A) and total diet intake (B) in mice following 3 weeks of diet consumption.

(BD= basal diet; FS = 10% FS diet; FO = 4% FO diet) (n=24/group).

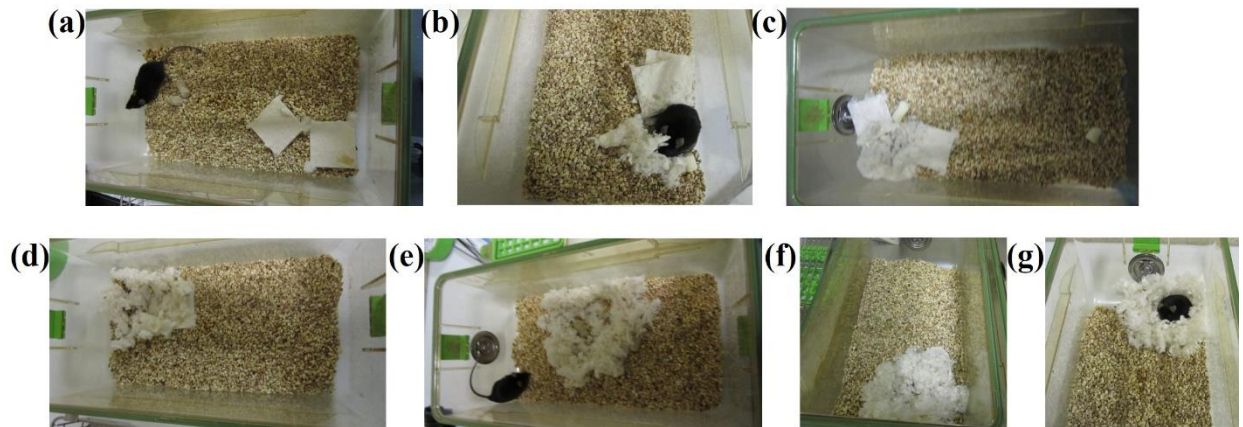

**Figure S2:** Representative pictures of nest quality scores.

A-G. Nest scores (0, 1, 2, 3, 4, 5, 6, 6.5). Scoring system can be found in Table S3.

(a)

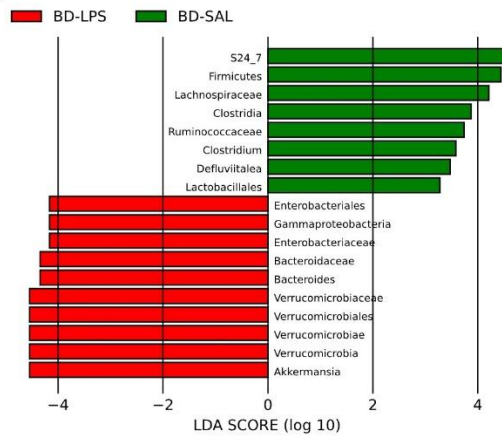

(b)

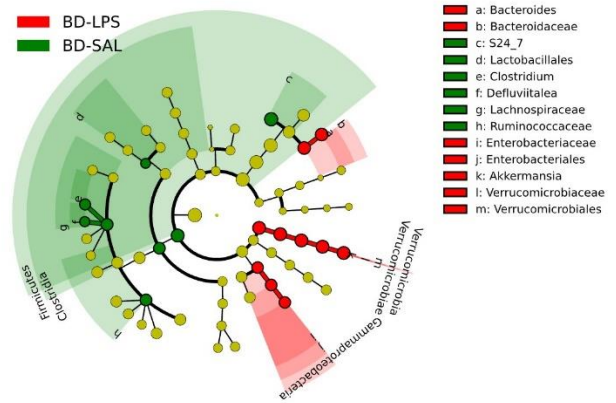

(c)

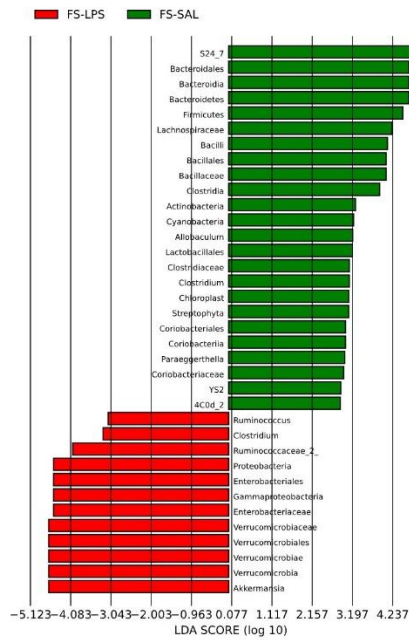

(d)

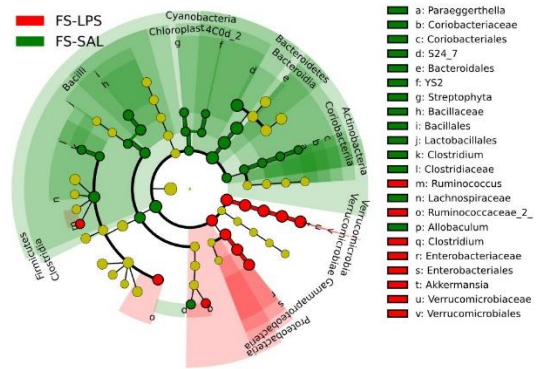

(e)

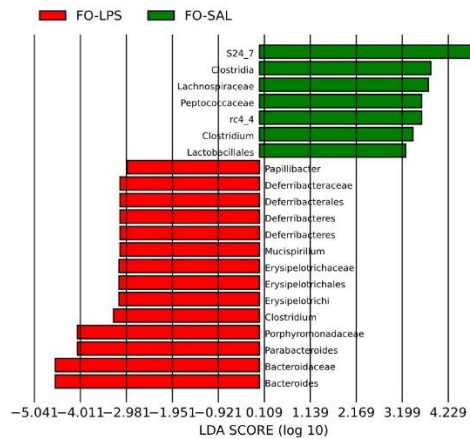

(f)

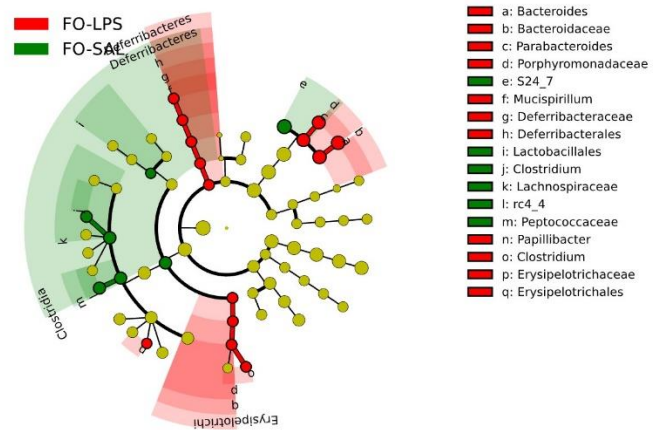

**Figure S3.** Lefse bar plots and cladograms for comparing SAL/LPS within diet.

A. LEfSE bar plot denoting the significantly different clades between the BD-SAL and BD-LPS mice. B. Cladogram depicting the significantly different clades from A. C. LEfSE bar plot denoting the significantly different clades between the FS-SAL and FS-LPS mice. D. Cladogram depicting the significantly different clades from C. E. LEfSE bar plot denoting the significantly different clades between the FO-SAL and FO-LPS mice. F. Cladogram depicting the significantly different clades from E. The cladogram colours denote a significantly increased clade in the LPS-challenged mice (red), and in the SAL-challenged mice (green), yellow denotes no significant changes. The diameter of the circle denotes the size of the taxon.

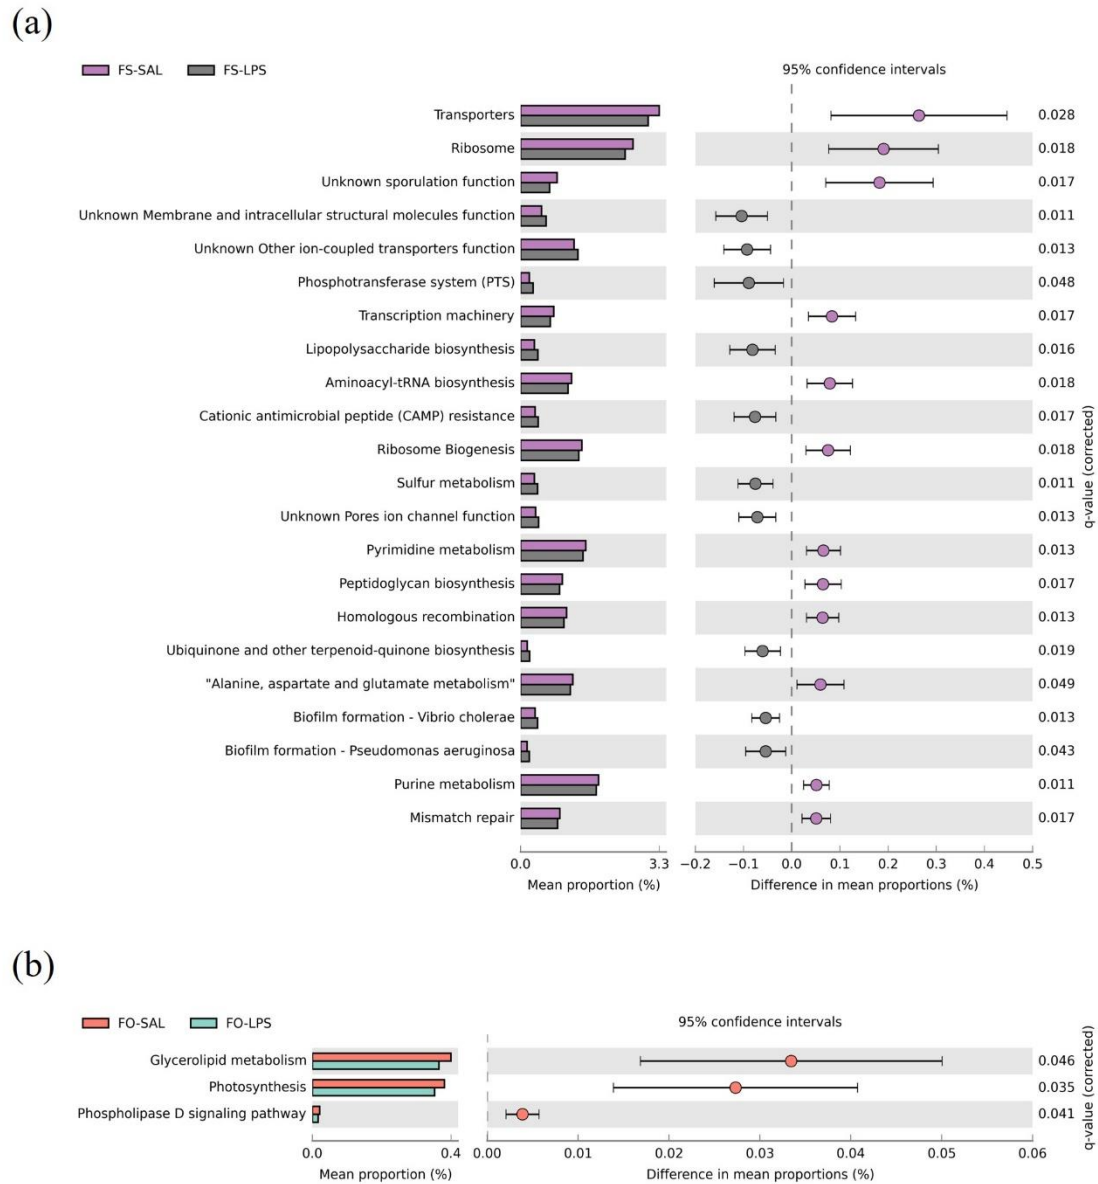

**Figure S4.** The inferred functional changes with LPS are diet dependent.

A. FS-fed mice had the greatest number of functional changes following a LPS-challenge. B. FO-fed mice had fewer inferred functional changes in the microbiota post-injection of LPS. An effect size filter was applied to the FS- fed mice to narrow the functions down from 132.

## Supplemental Tables

**Table S1: Macronutrient composition of whole ground flaxseed**

| Nutritional parameter   | Content (g/100g) | Method              |
|-------------------------|------------------|---------------------|
| Protein                 | 17.08            | AOAC 992.15         |
| Available carbohydrates | 3.6              | Calculation         |
| Fat                     | 39.7             | AOAC 996.06         |
| Saturated fatty acids   | 3.89             | AOAC 996.06         |
| Cis-MUFAs               | 6.87             | AOAC 996.06         |
| Cis-PUFAs               | 27.1             | AOAC 996.06         |
| Trans-fatty acids       | 0.13             | AOAC 996.06         |
| Omega-3 PUFAs           | 20.7             | AOAC 996.06         |
| Omega-6 PUFAs           | 6.40             | AOAC 996.06         |
| Total dietary fibre     | 30.6             | AOAC 991.43, 985.29 |
| Soluble dietary fibre   | 9.7              | AOAC 991.43         |
| Insoluble dietary fibre | 20.9             | Calculation         |
| Moisture                | 5.53             | AOAC\ADPI methods   |
| Ash                     | 3.5              | AOAC 923.03         |
| Energy (kcal)           | 501              | Calculation         |

**Table S2: Fatty acid profile of extracted flaxseed oil**

| Common Name                             | Systematic Name         | Lipid numbers      | Fatty acid content |        |
|-----------------------------------------|-------------------------|--------------------|--------------------|--------|
|                                         |                         |                    | %                  | mg/g   |
| Butyric acid                            | Butanoic acid           | <b>C4:0</b>        | 0.00               | 0.00   |
| Caproic acid                            | Hexanoic acid           | <b>C6:0</b>        | 0.00               | 0.00   |
| Caprylic acid                           | Octanoic acid           | <b>C8:0</b>        | 0.47               | 4.52   |
| Capric acid                             | Decanoic acid           | <b>C10:0</b>       | 0.01               | 0.06   |
| Lauric acid                             | Dodecanoic acid         | <b>C12:0</b>       | 0.01               | 0.14   |
| Myristic acid                           | Tetradecanoic acid      | <b>C14:0</b>       | 0.19               | 1.78   |
| Myristoleic acid                        | Tetradecenoic acid      | <b>C14:1</b>       | 0.00               | 0.00   |
| Pentadecylic acid                       | Pentadecanoic acid      | <b>C15:0</b>       | 0.01               | 0.13   |
| Palmitic acid                           | Hexadecanoic acid       | <b>C16:0</b>       | 5.46               | 52.63  |
| Palmitoleic acid                        | Hexadecenoic acid       | <b>C16:1</b>       | 0.07               | 0.63   |
| Stearic acid                            | Octadecanoic acid       | <b>C18:0</b>       | 3.98               | 38.30  |
| Oleic acid                              | Octadecenoic acid       | <b>C18:1 (C9)</b>  | 16.64              | 160.30 |
| Vaccenic acid                           | Octadecenoic acid       | <b>C18:1 (C11)</b> | 0.83               | 7.99   |
| Linoleic acid                           | Octadecadienoic         | <b>C18:2n6</b>     | 15.97              | 153.82 |
| $\gamma$ -Linolenic acid                | Octadecatrienoic acid   | <b>C18:3n6</b>     | 0.00               | 0.00   |
| $\alpha$ -linolenic acid (ALA)          | Octadecatrienoic acid   | <b>C18:3n3</b>     | 55.03              | 530.17 |
| Stearidonic acid                        | Octadecatetraenoic acid | <b>C18:4n3</b>     | 0.00               | 0.00   |
| Arachidic acid                          | Icosanoic acid          | <b>C20:0</b>       | 0.16               | 1.51   |
| Gadoleic acid                           | Eicosenoic acid         | <b>C20:1 (C7)</b>  | 0.04               | 0.39   |
| Gondoic acid                            | Eicosenoic acid         | <b>C20:1 (C9)</b>  | 0.14               | 1.36   |
| Paullinic acid                          | Eicosenoic acid         | <b>C20:1 (C11)</b> | 0.02               | 0.19   |
| Eicosadienoic acid                      | Eicosadienoic acid      | <b>C20:2n6</b>     | 0.08               | 0.75   |
| Dihomo- $\gamma$ -linolenic acid (DGLA) | Eicosatrienoic acid     | <b>C20:3n6</b>     | 0.00               | 0.00   |
| Arachidonic acid                        | Eicosatetraenoic acid   | <b>C20:4n6</b>     | 0.00               | 0.00   |
| ETrA                                    | Eicosatrienoic acid     | <b>C20:3n3</b>     | 0.13               | 1.22   |
| ETA                                     | Eicosatetraenoic acid   | <b>C20:4n3</b>     | 0.34               | 3.26   |
| EPA                                     | Eicosapentaenoic acid   | <b>C20:5n3</b>     | 0.03               | 0.32   |
| Behenic acid                            | Docosanoic acid         | <b>C22:0</b>       | 0.14               | 1.36   |
| Erucic acid                             | Docosenoic acid         | <b>C22:1</b>       | 0.06               | 0.61   |
| Docosadienoate                          | Docosadienoic acid      | <b>C22:2n6</b>     | 0.00               | 0.00   |
| Adrenic acid                            | Docosatetraenoic acid   | <b>C22:4n6</b>     | 0.11               | 1.08   |
| Osbond acid                             | Docosapentaenoic acid   | <b>C22:5n6</b>     | 0.00               | 0.00   |
| Clupanodonic acid                       | Docosapentaenoic acid   | <b>C22:5n3</b>     | 0.00               | 0.00   |
| DHA                                     | Docosahexaenoic acid    | <b>C22:6n3</b>     | 0.09               | 0.84   |
| Lignoceric acid                         | Tetracosanoic acid      | <b>C24:0</b>       | 0.00               | 0.00   |

**Table S3: Criteria for nest quality scores**

| Criteria   | Scoring details                                                                                                                                                                                                                                                                                                                                                                                                                                                                                                                                                                                                                                                                                                                                                                                                                                                                                                                                                                                                                                       |
|------------|-------------------------------------------------------------------------------------------------------------------------------------------------------------------------------------------------------------------------------------------------------------------------------------------------------------------------------------------------------------------------------------------------------------------------------------------------------------------------------------------------------------------------------------------------------------------------------------------------------------------------------------------------------------------------------------------------------------------------------------------------------------------------------------------------------------------------------------------------------------------------------------------------------------------------------------------------------------------------------------------------------------------------------------------------------|
| Shredding  | <ul style="list-style-type: none"> <li>• 0 = nestlets are unshredded</li> <li>• 0.5 = 1-25% shredded. 1 full nestlet square is left unshredded &amp; 1 nestlet has been partially shredded but is still less than half-shredded.</li> <li>• 1 = 26-50% shredded. One nestlet square remains unshredded. Other square is half- to fully-shredded.</li> <li>• 1.5 = 51-75% - Both nestlets have been shredded/touched (at least a little). Sum of the chunks are approximately <math>\frac{3}{4}</math> to <math>\frac{1}{2}</math> of one nestlet square</li> <li>• 2 = 76-95% &gt;1 pieces of nestlet material noticeable <ul style="list-style-type: none"> <li>○ Chunky texture</li> </ul> </li> <li>• 2.5 = &gt;= 96% - at most one small piece of unshredded material <ul style="list-style-type: none"> <li>○ Fluffy texture</li> </ul> </li> </ul>                                                                                                                                                                                              |
| Shape      | <ul style="list-style-type: none"> <li>• 0 = Scattered <ul style="list-style-type: none"> <li>○ Pieces of nest material are not all connected</li> <li>○ Very dispersed within the cage</li> <li>○ Scores of 0-1 for nest shredding</li> </ul> </li> <li>• 0.5 = Somewhat defined shape <ul style="list-style-type: none"> <li>○ Most of the material connects</li> <li>○ Both of the following: <ul style="list-style-type: none"> <li>▪ &gt; 2 edges are sticking out</li> <li>▪ Very dispersed within the cage</li> </ul> </li> </ul> </li> <li>• 1 = Mostly defined <ul style="list-style-type: none"> <li>○ All of the material connects</li> <li>○ Mostly rounded shape</li> <li>○ One of the following: <ul style="list-style-type: none"> <li>▪ &gt; 2 edges are sticking out</li> <li>▪ Very dispersed within the cage</li> </ul> </li> </ul> </li> <li>• 1.5 = Defined shape <ul style="list-style-type: none"> <li>○ Round shape</li> <li>○ Material is gathered <i>tightly</i> to ensure snug fit around the mouse</li> </ul> </li> </ul> |
| Location   | <ul style="list-style-type: none"> <li>• 0 = Front: touching front wall</li> <li>• 0.5 = Middle</li> <li>• 1 = Back: touching back wall</li> </ul>                                                                                                                                                                                                                                                                                                                                                                                                                                                                                                                                                                                                                                                                                                                                                                                                                                                                                                    |
| Nest walls | <ul style="list-style-type: none"> <li>• 0 = &lt; 25%</li> <li>• 0.5 = 25-49%</li> <li>• 1 = 50-75%</li> <li>• 1.5 = &gt; 75%</li> </ul>                                                                                                                                                                                                                                                                                                                                                                                                                                                                                                                                                                                                                                                                                                                                                                                                                                                                                                              |

**Table S4. Primer sequences**

| Gene          | Forward Primer 5' to 3'                                    | Reverse Primer 5' to 3'                                         |
|---------------|------------------------------------------------------------|-----------------------------------------------------------------|
| RPLP0         | ACTGGTCTAGGACCCGAGAAG                                      | TCTGACCTCTGTTCCACCCT                                            |
| IL-1 $\beta$  | AGTTGACGGACCCCAAAG                                         | GGACTACTCTCGTAGGTCGA                                            |
| TNF- $\alpha$ | CATCTTCTCAAAATTCGAGTGA<br>CAA                              | CCCAACATGGAACAGATGAGGG<br>T                                     |
| TLR-4         | AGAAAATGCCAGGATGATGC                                       | CTGATCCATGCATTGGTAGGT                                           |
| IL-10         | CCTGGGTGAGAAGCTGAAGAC                                      | CCTTGTAGACACCTTGGTCTTGG                                         |
| 16S           | TCGTCGGCAGCGTCAGATGTGT<br>ATAAGAGACAGCCTACGGGNG<br>GCWGCAG | GTCTCGTGGGCTCGGAGATGTGT<br>ATAAGAGACAGGACTACHVGGG<br>TATCTAATCC |

RPLP0: Ribosomal protein lateral stalk subunit P0, IL-1 $\beta$ : Interleukin 1 beta, TNF- $\alpha$ : Tumour necrosis factor alpha, TLR-4: Toll-like receptor 4, IL-10: Interleukin 10, 16S: 16S rRNA primer for amplicon PCR



**Table S5. The relative abundance of the fecal microbiota pre-injection**

| Taxonomy                    | Relative abundance (% $\pm$ SEM) |                      |                    |
|-----------------------------|----------------------------------|----------------------|--------------------|
|                             | BD                               | FS                   | FO                 |
| p__Bacteroidetes            | 51.019 $\pm$ 1.441               | 50.279 $\pm$ 1.428#  | 53.058 $\pm$ 1.002 |
| f__S24-7;g__                | 35.188 $\pm$ 1.127               | 36.852 $\pm$ 0.873   | 36.844 $\pm$ 1.402 |
| g__Bacteroides              | 9.919 $\pm$ 0.708                | 9.667 $\pm$ 0.851    | 9.642 $\pm$ 0.708  |
| g__Parabacteroides          | 5.912 $\pm$ 0.417                | 3.76 $\pm$ 0.443*#   | 6.572 $\pm$ 0582   |
| p__Firmicutes               | 29.591 $\pm$ 1.414               | 37.706 $\pm$ 1.244*# | 26.644 $\pm$ 1.365 |
| f__Ruminococcaceae; g__ (1) | 3.087 $\pm$ 0.249                | 4.608 $\pm$ 0.483*#  | 2.917 $\pm$ 0.275  |
| f__Ruminococcaceae; g__ (2) | 2.583 $\pm$ 0.259                | 2.006 $\pm$ 0.163    | 2.474 $\pm$ 0.246  |
| f__Lachnospiraceae; g__     | 5.264 $\pm$ 0.614                | 8.25 $\pm$ 0.62*#    | 3.923 $\pm$ 0.474  |
| o__Clostridiales; f__       | 6.517 $\pm$ 0.485                | 8.370 $\pm$ 0.684*   | 6.705 $\pm$ 0.427  |
| g__rc4-4                    | 2.791 $\pm$ 0.349                | 1.362 $\pm$ 0.207*#  | 2.823 $\pm$ 0.189  |
| g__Clostridium              |                                  |                      |                    |
| (f__Ruminococcaceae)        | 1.747 $\pm$ 0.206                | 2.372 $\pm$ 0.163*#  | 1.700 $\pm$ 0.197  |
| g__Sporobacter              | 1.436 $\pm$ 0.29                 | 1.291 $\pm$ 0.249    | 0.925 $\pm$ 0.136  |
| g__Clostridium              |                                  |                      |                    |
| (f__Clostridiaceae)         | 1.013 $\pm$ 0.15                 | 0.553 $\pm$ 0.111*   | 0.826 $\pm$ 0.158  |
| g__Oscillospira             | 0.542 $\pm$ 0.1                  | 0.372 $\pm$ 0.069    | 0.381 $\pm$ 0.060  |
| g__Dorea                    | 0.401 $\pm$ 0.044                | 0.185 $\pm$ 0.018*#  | 0.385 $\pm$ 0.043  |
| g__Defluviitalea            | 0.380 $\pm$ 0.046                | 0.184 $\pm$ 0.023*#  | 0.299 $\pm$ 0.031  |
| g__Lactobacillus            | 0.499 $\pm$ 0.177                | 0.405 $\pm$ 0.216*   | 0.372 $\pm$ 0.108  |
| f__Bacillaceae;__           | 0.768 $\pm$ 0.201                | 3.335 $\pm$ 0.547*#  | 0.706 $\pm$ 0.206  |
| g__Clostridium              |                                  |                      |                    |
| (f__Peptostreptococcaceae)  | 0.266 $\pm$ 0.065                | 0.03 $\pm$ 0.013*#   | 0.182 $\pm$ 0.061  |
| o__Lactobacillales; f__     | 0.196 $\pm$ 0.017                | 0.156 $\pm$ 0.02#    | 0.216 $\pm$ 0.022  |
| g__Clostridium              |                                  |                      |                    |
| (f__Lachnospiraceae)        | 1.266 $\pm$ 0.144                | 3.141 $\pm$ 0.198*#  | 1.022 $\pm$ 0.117  |
| g__Ruminococcus             |                                  |                      |                    |
| (f__Lachnospiraceae)        | 0.114 $\pm$ 0.023                | 0.223 $\pm$ 0.034*#  | 0.119 $\pm$ 0.015  |
| g__Allobaculum              | 0.193 $\pm$ 0.073                | 0.447 $\pm$ 0.081*#  | 0.213 $\pm$ 0.071  |
| p__Verrucomicrobia          | 16.38 $\pm$ 1.576                | 9.019 $\pm$ 1.219*#  | 18.339 $\pm$ 1.239 |
| g__Akkermansia              | 16.38 $\pm$ 1.576                | 9.019 $\pm$ 1.219*#  | 18.339 $\pm$ 1.239 |
| p__Proteobacteria           | 1.831 $\pm$ 0.722                | 1.023 $\pm$ 0.391*#  | 0.885 $\pm$ 0.454  |
| f__Enterobacteriaceae; g__  | 0.088 $\pm$ 0.02                 | 0.204 $\pm$ 0.05*    | 0.157 $\pm$ 0.044  |
| o__RF32 ;f__                | 1.743 $\pm$ 0.715                | 0.755 $\pm$ 0.391#   | 0.728 $\pm$ 0.451  |
| p__Actinobacteria           | 0.074 $\pm$ 0.022                | 0.978 $\pm$ 0.313*#  | 0.264 $\pm$ 0.209  |
| g__Bifidobacterium          | 0.018 $\pm$ 0.018                | 0.643 $\pm$ 0.305*   | 0.208 $\pm$ 0.207  |
| f__Coriobacteriaceae        | 0.003 $\pm$ 0.002                | 0.202 $\pm$ 0.030*#  | 0.002 $\pm$ 0.002  |
| p__Deferribacteres          | 0.478 $\pm$ 0.101                | 0.299 $\pm$ 0.092*#  | 0.307 $\pm$ 0.066  |
| g__Mucispirillum            | 0.478 $\pm$ 0.101                | 0.299 $\pm$ 0.092*   | 0.307 $\pm$ 0.066  |
| p__Tenericutes              | 0.608 $\pm$ 0.138                | 0.147 $\pm$ 0.065*#  | 0.44 $\pm$ 0.115   |
| g__Anaeroplasma             | 0.608 $\pm$ 0.138                | 0.147 $\pm$ 0.065*#  | 0.44 $\pm$ 0.115   |
| p__Cyanobacteria            | 0.019 $\pm$ 0.016                | 0.548 $\pm$ 0.275*#  | 0.064 $\pm$ 0.043  |
| o__Streptophyta; f__        | 0.019 $\pm$ 0.016                | 0.335 $\pm$ 0.251*#  | 0.064 $\pm$ 0.043  |

Mean relative abundance ( $\% \pm \text{SEM}$ ) of taxonomic groups in the fecal microbiota pre-injection at the Phylum level (grey), or the order, family, or genus level (white) with mean abundance greater than 0.2% in any group (n=24/group). \* = significant difference compared to BD ( $q < 0.05$ ), # = significant difference from FO ( $q < 0.05$ ) as measured by Mann-Whitney tests with Two-stage step-up (Benjamini, Krieger, and Yekutieli) method for False Discovery Rate (FDR) which was set to 5%.

**Table S6. The relative abundance of the fecal microbiota after SAL/LPS injection**

| Taxonomy              | Relative abundance (% $\pm$ SEM) |                    |                    |                    |                    |                    |
|-----------------------|----------------------------------|--------------------|--------------------|--------------------|--------------------|--------------------|
|                       | BD-SAL                           | BD-LPS             | FS-SAL             | FS-LPS             | FO-SAL             | FO-LPS             |
| p__Bacteroidetes      | 53.957 $\pm$ 1.76                | 51.488 $\pm$ 1.955 | 52.233 $\pm$ 1.727 | 43.421 $\pm$ 2.289 | 52.881 $\pm$ 1.381 | 50.558 $\pm$ 3.234 |
| f__S24-7;g__          | 37.901 $\pm$ 1.641               | 31.208 $\pm$ 1.297 | 40.949 $\pm$ 1.65  | 29.822 $\pm$ 1.763 | 38.244 $\pm$ 2.141 | 26.647 $\pm$ 1.23  |
| g__Bacteroides        | 9.699 $\pm$ 0.98                 | 14.354 $\pm$ 1.375 | 8.372 $\pm$ 1.076  | 9.47 $\pm$ 0.933   | 8.414 $\pm$ 1.102  | 15.302 $\pm$ 1.848 |
| g__Parabacteroides    | 6.357 $\pm$ 0.632                | 5.926 $\pm$ 0.537  | 2.912 $\pm$ 0.443  | 4.128 $\pm$ 0.454  | 6.223 $\pm$ 0.845  | 8.609 $\pm$ 0.975  |
| p__Firmicutes         | 29.225 $\pm$ 1.679               | 22.983 $\pm$ 1.942 | 38.455 $\pm$ 1.851 | 32.032 $\pm$ 2.164 | 24.31 $\pm$ 1.656  | 24.517 $\pm$ 1.927 |
| f__Ruminococcaceae;__ | 5.569 $\pm$ 0.881                | 5.362 $\pm$ 0.495  | 8.868 $\pm$ 0.757  | 8.034 $\pm$ 0.768  | 3.876 $\pm$ 0.599  | 6.688 $\pm$ 0.746  |
| f__Lachnospiraceae;__ | 5.674 $\pm$ 0.447                | 2.537 $\pm$ 0.405  | 6.13 $\pm$ 0.459   | 5.656 $\pm$ 0.708  | 4.557 $\pm$ 0.477  | 2.287 $\pm$ 0.415  |
| o__Clostridiales      | 7.606 $\pm$ 0.869                | 6.942 $\pm$ 0.644  | 8.377 $\pm$ 0.663  | 7.558 $\pm$ 0.853  | 6.167 $\pm$ 0.426  | 7.347 $\pm$ 0.682  |
| g__rc4-4              | 2.334 $\pm$ 0.482                | 2.083 $\pm$ 0.312  | 1.075 $\pm$ 0.209  | 0.99 $\pm$ 0.199   | 2.928 $\pm$ 0.289  | 1.566 $\pm$ 0.282  |
| g__Clostridium        | 1.383 $\pm$ 0.207                | 0.753 $\pm$ 0.113  | 4.002 $\pm$ 0.396  | 3.075 $\pm$ 0.37   | 0.834 $\pm$ 0.097  | 0.56 $\pm$ 0.081   |
| (f__Lachnospiraceae)  | 1.659 $\pm$ 0.309                | 1.115 $\pm$ 0.385  | 1.779 $\pm$ 0.399  | 1.381 $\pm$ 0.24   | 0.994 $\pm$ 0.23   | 0.99 $\pm$ 0.387   |
| g__Sporobacter        | 1.695 $\pm$ 0.183                | 1.42 $\pm$ 0.303   | 2.824 $\pm$ 0.3    | 2.273 $\pm$ 0.234  | 1.405 $\pm$ 0.169  | 1.723 $\pm$ 0.27   |
| g__Clostridium        | (f__Ruminococcaceae)             | 0.44 $\pm$ 0.28    | 0.176 $\pm$ 0.116  | 0.116 $\pm$ 0.283  | 0.169 $\pm$ 0.314  | 0.27 $\pm$ 0.314   |
| g__Lactobacillus      | 0.247 $\pm$ 0.32                 | 0.096 $\pm$ 0.107  | 0.047 $\pm$ 2.735  | 0.026 $\pm$ 0.522  | 0.116 $\pm$ 0.195  | 0.122 $\pm$ 0.068  |
| f__Bacillaceae;__     | 0.108 $\pm$ 0.384                | 0.082 $\pm$ 0.363  | 0.564 $\pm$ 0.274  | 0.169 $\pm$ 0.287  | 0.095 $\pm$ 0.348  | 0.028 $\pm$ 0.411  |
| g__Dorea              | 0.049 $\pm$ 0.224                | 0.043 $\pm$ 0.298  | 0.043 $\pm$ 0.305  | 0.055 $\pm$ 0.107  | 0.043 $\pm$ 0.765  | 0.069 $\pm$ 0.334  |
| g__Clostridium        | (f__Clostridiaceae)              | 0.068 $\pm$ 0.094  | 0.115 $\pm$ 0.115  | 0.049 $\pm$ 0.049  | 0.219 $\pm$ 0.219  | 0.117 $\pm$ 0.117  |
| g__Oscillospira       | 0.505 $\pm$ 0.058                | 0.405 $\pm$ 0.122  | 0.338 $\pm$ 0.071  | 0.31 $\pm$ 0.031   | 0.493 $\pm$ 0.068  | 0.539 $\pm$ 0.105  |
| g__Defluviitalea      | 0.36 $\pm$ 0.036                 | 0.203 $\pm$ 0.024  | 0.271 $\pm$ 0.046  | 0.249 $\pm$ 0.048  | 0.319 $\pm$ 0.045  | 0.387 $\pm$ 0.089  |
| o__Lactobacillales    | 0.231 $\pm$ 0.046                | 0.127 $\pm$ 0.026  | 0.219 $\pm$ 0.024  | 0.091 $\pm$ 0.018  | 0.211 $\pm$ 0.017  | 0.106 $\pm$ 0.012  |
| g__Allobaculum        | 0.096 $\pm$ 0.057                | 0.027 $\pm$ 0.016  | 0.396 $\pm$ 0.91   | 0.14 $\pm$ 0.053   | 0.094 $\pm$ 0.062  | 0.089 $\pm$ 0.063  |
| g__Clostridium        | (f__Erysipelotrichaceae)         | 0.102 $\pm$ 0.035  | 0.21 $\pm$ 0.072   | 0.072 $\pm$ 0.144  | 0.084 $\pm$ 0.022  | 0.338 $\pm$ 0.065  |
| g__Papillibacter      | 0.086 $\pm$ 0.048                | 0.116 $\pm$ 0.056  | 0.104 $\pm$ 0.026  | 0.109 $\pm$ 0.03   | 0.101 $\pm$ 0.041  | 0.21 $\pm$ 0.044   |
| p__Verrucomicrobia    | 13.974 $\pm$ 2.587               | 21.225 $\pm$ 1.745 | 7.368 $\pm$ 1.466  | 16.579 $\pm$ 2.01  | 19.603 $\pm$ 1.414 | 21.164 $\pm$ 2.663 |
| g__Akkermansia        | 13.974 $\pm$ 2.587               | 21.225 $\pm$ 1.745 | 7.368 $\pm$ 1.466  | 16.579 $\pm$ 2.01  | 19.603 $\pm$ 1.414 | 21.164 $\pm$ 2.663 |
| p__Proteobacteria     | 1.815 $\pm$ 1.317                | 3.313 $\pm$ 1.868  | 0.743 $\pm$ 0.242  | 7.113 $\pm$ 2.152  | 0.782 $\pm$ 0.282  | 3.191 $\pm$ 1.243  |

|                       |               |               |               |               |               |               |
|-----------------------|---------------|---------------|---------------|---------------|---------------|---------------|
| f__Enterobacteriaceae | 0.4 ± 0.11    | 3.148 ± 1.879 | 0.603 ± 0.195 | 7.071 ± 2.153 | 0.429 ± 0.136 | 3.124 ± 1.256 |
| o__RF32               | 1.415 ± 1.274 | 0.165 ± 0.157 | 0.039 ± 0.031 | 0.012 ± 0.008 | 0.353 ± 0.248 | 0.067 ± 0.065 |
| p__Actinobacteria     | 0.066 ± 0.014 | 0.042 ± 0.012 | 0.817 ± 0.370 | 0.198 ± 0.043 | 0.068 ± 0.018 | 0.123 ± 0.03  |
| g__Bifidobacterium    | 0 ± 0         | 0 ± 0         | 0.545 ± 0.363 | 0.043 ± 0.038 | 0.001 ± 0.001 | 0 ± 0         |
| p__Deferribacteres    | 0.475 ± 0.154 | 0.613 ± 0.127 | 0.21 ± 0.048  | 0.475 ± 0.178 | 0.149 ± 0.025 | 0.382 ± 0.099 |
| g__Mucispirillum      | 0.475 ± 0.154 | 0.613 ± 0.127 | 0.21 ± 0.048  | 0.475 ± 0.178 | 0.149 ± 0.025 | 0.382 ± 0.099 |
| p__Tenericutes        | 0.395 ± 0.147 | 0.326 ± 0.193 | 0.058 ± 0.03  | 0.073 ± 0.06  | 0.269 ± 0.09  | 0.062 ± 0.03  |
| g__Anaeroplasma       | 0.395 ± 0.147 | 0.326 ± 0.193 | 0.058 ± 0.03  | 0.073 ± 0.06  | 0.269 ± 0.09  | 0.062 ± 0.03  |
| p__Cyanobacteria      | 0.033 ± 0.031 | 0.126 ± 0.126 | 0.938 ± 0.535 | 0.403 ± 0.087 | 0.066 ± 0.065 | 0.2 ± 0.199   |
| o__Streptophyta       | 0 ± 0         | 0 ± 0         | 0.310 ± 0.075 | 0.108 ± 0.035 | 0 ± 0         | 0 ± 0         |
| o__YS2                | 0.126 ± 0.126 | 0.010 ± 0.009 | 0.093 ± 0.076 | 0 ± 0         | 0.200 ± 0.199 | 0.003 ± 0.003 |

Mean relative abundance (% ± SEM) of taxonomic groups in the fecal microbiota pre and post LPS injection at the Phylum level (grey), or the class, order, family, or genus level (white) with mean abundance greater than 0.2% in any group (n=12/group).

**Table S7: Clades reduced by an LPS challenge (corresponds to Figure 8d)**

| Diet groups | Number of Similarities | Specific clades                                                                                                                                                                                                                      |
|-------------|------------------------|--------------------------------------------------------------------------------------------------------------------------------------------------------------------------------------------------------------------------------------|
| BD FO FS    | 5                      | S24-7 Lachnospiraceae Lactobacillales Clostridium Clostridia                                                                                                                                                                         |
| BD FS       | 1                      | Firmicutes                                                                                                                                                                                                                           |
| BD          | 2                      | Defluviitalea Ruminococcaceae                                                                                                                                                                                                        |
| FS          | 18                     | 4C0d_2 Paraeggerthella Bacteroidetes Coriobacteriaceae Streptophyta Cyanobacteria Bacteroidia YS2 Coriobacteriales Actinobacteria Bacteroidales Bacillales Allobaculum Chloroplast Clostridiaceae Coriobacteriia Bacilli Bacillaceae |
| FO          | 2                      | rc4-4 Peptococcaceae                                                                                                                                                                                                                 |

**Table S8: Clades increased by an LPS challenge (corresponds to Figure 8e)**

| <b>Diet groups</b> | <b>Number of Similarities</b> | <b>Specific clades</b>                                                                                                                                                              |
|--------------------|-------------------------------|-------------------------------------------------------------------------------------------------------------------------------------------------------------------------------------|
| BD FS              | 8                             | Gammaproetobacteria Verrucomicrobiaceae<br>Verrucomicrobiales Enterobacteriales Enterobacteriaceae<br>Akkermansia Verrucomicrobioae Verrucomicrobia                                 |
| BD FO              | 2                             | Bacteroides Bacteroidaceae                                                                                                                                                          |
| FO FS              | 1                             | Clostridium                                                                                                                                                                         |
| FS                 | 3                             | Proteobacteria Ruminococcus Ruminococcaceae (2)                                                                                                                                     |
| FO                 | 10                            | Erysipelotrichaceae Erysipelotrichi Deferribacterales<br>Erysipelotrichales Parabacteroides Papillibacter<br>Deferribacteres Porphyromonadaceae Mucispirillum<br>Deferribacteraceae |
